# Supplementary material for: Bacterial diversity and potential risk factors associated with Salmonella contamination of seafood products sold in retail markets in Bangkok, Thailand
Source: PeerJ. 2021 Dec 24;9:e12694. doi: 10.7717/peerj.12694 (PMC8711275; doi:10.7717/peerj.12694)
Supplement: Supplemental Information 1 — This raw data was used for statistical analysis. Abbreviations and codes are stated in the directory sheet. [file peerj-09-12694-s001.xlsx]

## Sheet: Raw data
ID	Date		Sample	Weight	District old	District	Location	Shelf	Ice	S old	Source	Region	km	BGLB	FC MPN	EC MPN	FC	EC	EC cut	VP	VV	VA	VC	Sal	EC 0.0001	FC0.0001	EC	FC
1	161018	1	0	15	0	0	0	1	1	0	0	0	0	111000	111000	46037	1	1	1	0	0	1	1	1	46037	111000	4.66311	5.04532
2	161018	2	0	15	0	0	0	1	1	1	0	0	0	111000	111000	4604	1	1	1	0	0	1	1	1	4604	111000	3.66314	5.04532
3	161018	3	0	33	0	1	1	1	1	2	1	0	36	4600	10896	460	1	1	1	1	0	1	0	1	460	10896	2.66276	4.03727
4	161018	4	0	33	0	1	1	1	1	3	2	0	29	11000	10896	4604	1	1	1	1	0	0	1	1	4604	10896	3.66314	4.03727
5	161018	5	0	33	0	1	1	1	1	2	1	0	36	4600	4604	1090	1	1	1	1	0	0	0	1	1090	4604	3.03743	3.66314
6	161018	6	0	33	0	1	1	1	1	4	0	0	0	21000	21450	460	1	1	1	1	0	0	1	1	460	21450	2.66276	4.33143
7	161018	7	0	33	0	1	1	1	1	3	2	0	29	230	460	460	1	1	1	0	0	0	1	1	460	460	2.66276	2.66276
8	161018	8	0	33	0	0	0	1	1	2	1	0	36	24000	46037	749	1	1	1	1	1	1	1	1	749	46037	2.87448	4.66311
9	161018	9	0	15	0	0	0	1	1	2	1	0	36	4300	111000	4604	1	1	1	1	0	0	1	1	4604	111000	3.66314	5.04532
10	161018	10	0	15	0	0	0	1	1	5	3	1	75	111000	111000	3849	1	1	1	0	0	0	1	1	3849	111000	3.58535	5.04532
11	251018	1	0	33	0	0	0	1	1	6	1	0	36	4600	4604	460	1	1	1	1	0	0	1	0	460	4604	2.66276	3.66314
12	251018	2	0	33	0	0	0	1	1	2	1	0	36	15000	14926	460	1	1	1	1	0	1	1	0	460	14926	2.66276	4.17394
13	251018	3	0	33	0	0	0	1	1	2	1	0	36	46000	46037	460	1	1	1	1	0	0	1	1	460	46037	2.66276	4.66311
14	251018	4	0	20	0	0	0	1	0	NA	13	3		111000	111000	460	1	1	1	0	0	0	1	0	460	111000	2.66276	5.04532
15	251018	5	0	15	0	1	1	1	0	NA	13	3		111000	111000	21449	1	1	1	0	0	0	1	1	21449	111000	4.33141	5.04532
16	251018	6	0	15	0	1	1	1	0	NA	13	3		46000	46037	4604	1	1	1	0	0	1	1	1	4604	46037	3.66314	4.66311
17	251018	7	0	33	0	1	1	1	1	7	2	0	29	111000	111000	2145	1	1	1	1	0	0	1	0	2145	111000	3.33143	5.04532
18	251018	8	0	33	0	1	1	1	1	5	3	1	75	110000	108956	1493	1	1	1	0	0	0	1	1	1493	108956	3.17406	5.03725
19	251018	9	0	33	0	1	1	1	1	3	2	0	29	111000	111000	21450	1	1	1	1	1	0	1	1	21450	111000	4.33143	5.04532
20	251018	10	0	33	0	1	1	1	1	7	2	0	29	111000	111000	1090	1	1	1	1	1	1	1	0	1090	111000	3.03743	5.04532
21	251018	11	0	33	0	1	1	1	1	3	2	0	29	111000	111000	1090	1	1	1	0	0	0	1	1	1090	111000	3.03743	5.04532
22	251018	12	0	33	0	1	1	1	1	3	2	0	29	111000	111000	4604	1	1	1	0	0	0	1	0	4604	111000	3.66314	5.04532
23	251018	13	0	33	0	1	1	1	1	3	2	0	29	111000	111000	46037	1	1	1	0	0	0	1	1	46037	111000	4.66311	5.04532
24	251018	14	0	20	0	1	1	1	0	3	2	0	29	111000	111000	111000	1	1	1	1	1	0	1	1	111000	111000	5.04532	5.04532
25	251018	15	0	33	0	1	1	1	1	2	1	0	36	111000	111000	460	1	1	1	1	1	0	1	1	460	111000	2.66276	5.04532
26	251018	16	0	15	0	1	1	1	0	5	3	1	75	111000	111000	111000	1	1	1	0	0	1	1	1	111000	111000	5.04532	5.04532
27	11118	1	1	7.79	0	1	1	1	1	NA	13	3		111000	111000	46037	1	1	1	0	1	0	0	0	46037	111000	4.66311	5.04532
28	11118	2	1	7.55	0	1	1	1	1	NA	13	3		111000	111000	4604	1	1	1	0	0	0	1	1	4604	111000	3.66314	5.04532
29	11118	3	1	6.85	0	1	1	1	1	NA	13	3		111000	111000	460	1	1	1	0	0	0	1	1	460	111000	2.66276	5.04532
30	11118	4	1	6.53	0	1	1	1	1	2	1	0	36	111000	111000	14926	1	1	1	0	0	1	1	1	14926	111000	4.17394	5.04532
31	11118	5	1	6.87	0	1	1	1	1	2	1	0	36	111000	111000	46037	1	1	1	0	0	1	0	1	46037	111000	4.66311	5.04532
32	11118	6	1	6.38	0	1	1	1	1	2	1	0	36	111000	111000	1102	1	1	1	0	0	1	1	1	1102	111000	3.04218	5.04532
33	211118	1	1	4.65	0	0	0	1	1	2	1	0	36		111000	10896	1	1	1	1	0	0	1	1	10896	111000	4.03727	5.04532
34	211118	2	1	5.3	0	0	0	1	1	2	1	0	36		111000	10896	1	1	1	1	0	1	0	1	10896	111000	4.03727	5.04532
35	211118	3	1	5.3	0	0	0	1	1	2	1	0	36		111000	4604	1	1	1	0	0	0	0	0	4604	111000	3.66314	5.04532
36	211118	4	1	4.75	0	1	1	1	1	3	2	0	29		111000	46037	1	1	1	1	1	0	0	1	46037	111000	4.66311	5.04532
37	211118	5	1	4.53	0	1	1	1	1	2	1	0	36		111000	108956	1	1	1	1	0	1	1	1	108956	111000	5.03725	5.04532
38	211118	6	1	5.2	0	1	1	1	1	7	2	0	29		111000	4604	1	1	1	1	0	0	1	1	4604	111000	3.66314	5.04532
39	211118	7	2	1.87	0	1	1	1	1	7	2	0	29		111000	460	1	1	1	1	1	0	1	1	460	111000	2.66276	5.04532
40	211118	8	1	5.1	0	1	1	1	1	8	4	1	81		111000	108956	1	1	1	1	0	0	0	1	108956	111000	5.03725	5.04532
41	211118	9	1	4.82	0	1	1	1	1	2	1	0	36		111000	108956	1	1	1	1	1	1	0	0	108956	111000	5.03725	5.04532
42	211118	10	1	5.07	0	1	1	1	1	2	1	0	36		111000	111000	1	1	1	1	0	0	0	0	111000	111000	5.04532	5.04532
43	261118	1	0		1	2	2	1	0	9	5	2	585		4604	24	1	1	1	0	0	0	1	0	24.0001	4604	1.38021	3.66314
44	261118	2	0		1	2	2	1	0	9	5	2	585		46037	24	1	1	1	1	0	0	1	0	24.0001	46037	1.38021	4.66311
45	261118	3	0		1	2	2	0	0	10	6	2	814		111000	238	1	1	1	0	1	0	1	0	238	111000	2.37658	5.04532
46	261118	4	0		1	2	2	0	0	10	6	2	814		111000	238	1	1	1	1	0	0	1	0	238	111000	2.37658	5.04532
47	261118	5	0		1	2	2	1	1	11	7	2	644		111000	4604	1	1	1	0	0	0	0	0	4604	111000	3.66314	5.04532
48	261118	6	1	4.66	1	2	2	1	1	8	4	1	81		111000	10896	1	1	1	0	0	1	0	1	10896	111000	4.03727	5.04532
49	261118	7	0		1	2	2	1	1	2	1	0	36		111000	460	1	1	1	0	0	1	0	0	460	111000	2.66276	5.04532
50	261118	8	0		1	2	2	1	1	2	1	0	36		111000	21450	1	1	1	1	1	0	0	0	21450	111000	4.33143	5.04532
51	261118	9	0		1	2	2	1	1	12	0	0	0		111000	460	1	1	1	1	0	0	0	0	460	111000	2.66276	5.04532
52	261118	10	1	5.29	1	2	2	1	1	13	11	2			111000	460	1	1	1	0	0	0	1	0	460	111000	2.66276	5.04532
53	261118	11	0		1	2	2	1	1	12	0	0	0		111000	460	1	1	1	0	1	0	1	1	460	111000	2.66276	5.04532
54	261118	12	0		1	2	2	1	1	12	0	0	0		111000	460	1	1	1	1	1	0	0	1	460	111000	2.66276	5.04532
55	261118	13	0		1	2	2	1	1	12	0	0	0		111000	111000	1	1	1	1	1	1	0	1	111000	111000	5.04532	5.04532
56	261118	14	0		1	2	2	1	1	12	0	0	0		111000	108956	1	1	1	1	0	0	0	0	108956	111000	5.03725	5.04532
57	261118	15	0		1	2	2	1	1	12	0	0	0		111000	10896	1	1	1	0	0	0	0	0	10896	111000	4.03727	5.04532
58	261118	16	0		1	2	2	1	1	12	0	0	0		111000	7486	1	1	1	0	0	0	0	0	7486	111000	3.87425	5.04532
59	301118	1	1	4.51	1	2	2	1	1	8	4	1	81		111000	0	1	0	0	0	0	0	0	0	0.0001	111000	-4	5.04532
60	301118	2	0		1	2	2	1	0	12	0	0	0		111000	23	1	1	1	1	1	0	1	1	23.0001	111000	1.36173	5.04532
61	301118	3	0		1	2	2	1	0	11	7	2	644		111000	46037	1	1	1	1	0	1	0	1	46037	111000	4.66311	5.04532
62	301118	4	0		1	2	2	1	0	9	5	2	585		111000	46037	1	1	1	1	0	1	0	1	46037	111000	4.66311	5.04532
63	301118	5	1	4.87	1	2	2	1	1	14	8	0	72		111000	1493	1	1	1	0	0	1	0	0	1493	111000	3.17406	5.04532
64	301118	6	0		1	2	2	0	0	NA	13	3			111000	4604	1	1	1	1	0	1	0	0	4604	111000	3.66314	5.04532
65	301118	7	0		1	2	2	1	0	NA	13	3			111000	7486	1	1	1	1	0	0	1	0	7486	111000	3.87425	5.04532
66	301118	8	0		1	2	2	1	1	12	0	0	0		111000	460	1	1	1	0	1	0	0	0	460	111000	2.66276	5.04532
67	301118	9	0		1	2	2	1	1	12	0	0	0		111000	460	1	1	1	1	0	1	1	0	460	111000	2.66276	5.04532
68	301118	10	0		1	2	2	1	1	12	0	0	0		111000	1368	1	1	1	1	1	1	1	0	1368	111000	3.13609	5.04532
69	301118	11	0		1	2	2	1	1	12	0	0	0		111000	14926	1	1	1	1	0	1	0	1	14926	111000	4.17394	5.04532
70	301118	12	0		1	2	2	1	1	12	0	0	0		111000	1089	1	1	1	1	0	1	0	0	1089	111000	3.03703	5.04532
71	301118	13	0		1	2	2	0	0	11	7	2	644		111000	4600	1	1	1	1	0	1	0	1	4600	111000	3.66276	5.04532
72	301118	14	0		1	2	2	1	1	2	1	0	36		111000	460	1	1	1	1	0	1	0	0	460	111000	2.66276	5.04532
73	301118	15	0	4.31	1	2	2	1	0	15	9	2	463		111000	460	1	1	1	1	0	0	1	0	460	111000	2.66276	5.04532
74	301118	16	0	4.37	1	2	2	1	0	15	9	2	463		111000	460	1	1	1	0	0	1	1	0	460	111000	2.66276	5.04532
75	51218	1	0		2	3	3	1	0	NA	13	3			111000	46037	1	1	1	0	0	1	1	1	46037	111000	4.66311	5.04532
76	51218	2	0		2	3	3	1	0	17	8	0	72		111000	21450	1	1	1	1	1	1	1	1	21450	111000	4.33143	5.04532
77	51218	3	0		2	3	3	1	0	2	1	0	36		111000	4604	1	1	1	1	1	0	1	0	4604	111000	3.66314	5.04532
78	51218	4	0		2	3	3	1	0	NA	13	3			111000	749	1	1	1	1	0	0	0	0	749	111000	2.87448	5.04532
79	51218	5	0		2	3	3	1	0	7	2	0	29		111000	460	1	1	1	1	1	0	1	0	460	111000	2.66276	5.04532
80	51218	6	0		2	3	3	1	0	7	2	0	29		111000	24	1	1	1	1	1	0	1	0	24.0001	111000	1.38021	5.04532
81	51218	7	0		2	3	3	1	0	2	1	0	36		111000	1090	1	1	1	1	1	0	1	0	1090	111000	3.03743	5.04532
82	51218	8	0		2	3	3	1	0	2	1	0	36		111000	4604	1	1	1	0	0	1	1	1	4604	111000	3.66314	5.04532
83	51218	9	0		2	3	3	1	0	17	8	0	72		111000	23	1	1	1	0	0	0	1	0	23.0001	111000	1.36173	5.04532
84	51218	10	0		2	3	3	1	0	2	1	0	36		111000	427	1	1	1	1	0	0	1	0	427	111000	2.63043	5.04532
85	51218	11	0		2	3	3	1	0	2	1	0	36		111000	4600	1	1	1	0	1	0	1	0	4600	111000	3.66276	5.04532
86	51218	12	0		2	3	3	1	0	2	1	0	36		111000	1493	1	1	1	0	1	0	1	0	1493	111000	3.17406	5.04532
87	51218	13	0		2	3	3	1	0	3	2	0	29		111000	4604	1	1	1	0	1	1	1	1	4604	111000	3.66314	5.04532
88	51218	14	0		2	3	3	1	0	12	0	0	0		111000	460	1	1	1	1	1	0	1	1	460	111000	2.66276	5.04532
89	51218	15	1		2	3	3	1	0	2	1	0	36		111000	111000	1	1	1	0	0	0	0	1	111000	111000	5.04532	5.04532
90	51218	16	1		2	3	3	1	0	2	1	0	36		111000	110000	1	1	1	1	0	0	0	0	110000	111000	5.04139	5.04532
91	121218	1	0		2	3	3	1	0	12	0	0	0		108956	1090	1	1	1	1	1	0	0	1	1090	108956	3.03743	5.03725
92	121218	2	0		2	3	3	1	1	0	0	0	0		108956	4604	1	1	1	0	1	0	1	1	4604	108956	3.66314	5.03725
93	121218	3	0		2	3	3	1	0	16	10	0	20		111000	2915	1	1	1	1	1	0	1	1	2915	111000	3.46464	5.04532
94	121218	4	1	6.62	2	3	3	1	0	16	10	0	20		46037	460	1	1	1	0	0	0	0	1	460	46037	2.66276	4.66311
95	121218	5	0		2	3	3	1	0	2	1	0	36		46037	23	1	1	1	0	0	1	0	0	23.0001	46037	1.36173	4.66311
96	121218	6	1	4.68	2	3	3	1	0	2	1	0	36		108956	460	1	1	1	0	0	0	0	0	460	108956	2.66276	5.03725
97	121218	7	0		2	3	3	1	1	7	2	0	29		108956	460	1	1	1	0	0	0	0	1	460	108956	2.66276	5.03725
98	121218	8	0		2	3	3	1	1	7	2	0	29		46037	460	1	1	1	0	1	0	1	1	460	46037	2.66276	4.66311
99	121218	9	0		2	3	3	1	1	2	1	0	36		108956	4604	1	1	1	0	1	1	1	0	4604	108956	3.66314	5.03725
100	121218	10	0		2	3	3	1	0	2	1	0	36		108956	4604	1	1	1	1	1	0	1	0	4604	108956	3.66314	5.03725
101	121218	11	0		2	3	3	1	0	2	1	0	36		108956	4604	1	1	1	1	0	0	1	0	4604	108956	3.66314	5.03725
102	121218	12	0		2	3	3	1	0	2	1	0	36		108956	4604	1	1	1	1	0	0	1	0	4604	108956	3.66314	5.03725
103	121218	13	0		2	3	3	1	1	16	10	0	20		46037	460	1	1	1	0	1	0	0	0	460	46037	2.66276	4.66311
104	121218	14	0		2	3	3	1	1	7	2	0	29		46037	460	1	1	1	1	1	0	1	0	460	46037	2.66276	4.66311
105	121218	15	0		2	3	3	1	1	0	0	0	0		108956	460	1	1	1	0	0	0	1	1	460	108956	2.66276	5.03725
106	121218	16	0		2	3	3	1	1	7	2	0	29		108956	460	1	1	1	1	1	1	1	0	460	108956	2.66276	5.03725
107	121218	17	0		2	3	3	1	0	12	0	0	0		108956	1090	1	1	1	0	1	0	1	1	1090	108956	3.03743	5.03725
108	181218	1	0		0	0	0	1	1	2	1	0	36		46000	460	1	1	1	1	0	1	0	0	460	46000	2.66276	4.66276
109	181218	2	0		0	0	0	1	0	2	1	0	36		111000	460	1	1	1	1	1	0	1	0	460	111000	2.66276	5.04532
110	40119	1	1	4.53	0	1	1	1	1	NA	13	3			111000	111000	1	1	1	0	0	1	0	0	111000	111000	5.04532	5.04532
111	40119	2	1	5.12	0	1	1	1	1	NA	13	3			111000	111000	1	1	1	0	0	0	0	0	111000	111000	5.04532	5.04532
112	40119	3	1	4.26	0	1	1	1	0	NA	13	3			111000	1090	1	1	1	0	1	1	1	0	1090	111000	3.03743	5.04532
113	40119	4	1	6.8	0	1	1	1	1	NA	13	3			111000	4408	1	1	1	0	0	0	1	0	4408	111000	3.64424	5.04532
114	40119	5	1	5.95	0	1	1	1	1	18	4	1	81		111000	3604	1	1	1	0	0	0	0	0	3604	111000	3.55678	5.04532
115	40119	6	1	4.78	0	1	1	1	0	8	4	1	81		111000	0	1	0	0	0	1	1	0	1	0.0001	111000	-4	5.04532
116	40119	7	1	7.86	1	2	2	1	1	19	1	0	36		111000	108956	1	1	1	0	0	0	0	0	108956	111000	5.03725	5.04532
117	40119	8	1	5.96	1	2	2	1	1	8	4	1	81		111000	111000	1	1	1	1	0	0	0	0	111000	111000	5.04532	5.04532
118	40119	9	1	5.1	1	2	2	1	1	8	4	1	81		111000	108956	1	1	1	1	0	0	0	1	108956	111000	5.03725	5.04532
119	40119	10	1	5.62	1	2	2	1	1	11	7	2	644		111000	108956	1	1	1	1	1	0	0	0	108956	111000	5.03725	5.04532
120	40119	11	1	4.62	1	2	2	1	1	12	0	0	0		111000	9323	1	1	1	0	0	0	0	0	9323	111000	3.96956	5.04532
121	40119	12	1	5.47	1	2	2	1	1	19	1	0	36		111000	21450	1	1	1	0	1	1	0	0	21450	111000	4.33143	5.04532
122	40119	13	1	7.91	2	3	3	1	0	2	1	0	36		111000	4604	1	1	1	0	0	0	0	0	4604	111000	3.66314	5.04532
123	40119	14	1	5.04	2	3	3	1	0	2	1	0	36		111000	2763	1	1	1	0	1	0	0	0	2763	111000	3.44138	5.04532
124	40119	15	1	4.88	2	3	3	1	0	2	1	0	36		111000	4242	1	1	1	1	1	0	0	0	4242	111000	3.62757	5.04532
125	40119	16	1	5.67	2	3	3	1	0	2	1	0	36		111000	1090	1	1	1	1	0	0	1	0	1090	111000	3.03743	5.04532
126	40119	17	1	5.31	2	3	3	1	0	2	1	0	36		111000	21450	1	1	1	1	1	1	1	0	21450	111000	4.33143	5.04532
127	40119	18	1	5.7	2	3	3	1	0	2	1	0	36		111000	2035	1	1	1	0	0	0	1	0	2035	111000	3.30856	5.04532
128	80119	1	1	6.73	1	2	2	1	1	19	1	0	36		111000	0	1	0	0	1	0	1	0	0	0.0001	111000	-4	5.04532
129	80119	2	1	4.63	1	2	2	1	1	8	4	1	81		111000	0	1	0	0	1	0	0	0	1	0.0001	111000	-4	5.04532
130	80119	3	1	5.97	1	2	2	1	1	8	4	1	81		111000	0	1	0	0	0	0	0	0	1	0.0001	111000	-4	5.04532
131	80119	4	1	6.77	1	2	2	1	1	11	7	2	644		111000	0	1	0	0	0	0	0	0	0	0.0001	111000	-4	5.04532
132	80119	5	1	4.5	0	0	0	1	1	2	1	0	36		111000	2677	1	1	1	1	0	0	0	0	2677	111000	3.42765	5.04532
133	80119	6	1	5.16	0	0	0	1	1	2	1	0	36		111000	111000	1	1	1	0	0	0	0	0	111000	111000	5.04532	5.04532
134	80119	7	1	5.8	0	0	0	1	0	2	1	0	36		111000	108956	1	1	1	1	0	0	0	0	108956	111000	5.03725	5.04532
135	80119	8	1	5.15	0	1	1	1	1	7	2	0	29		111000	4408	1	1	1	1	0	1	0	0	4408	111000	3.64424	5.04532
136	80119	9	1	5.34	0	1	1	1	1	2	1	0	36		111000	111000	1	1	1	0	0	1	1	1	111000	111000	5.04532	5.04532
137	80119	10	1	6.73	0	1	1	1	0	2	1	0	36		111000	111000	1	1	1	1	0	0	0	0	111000	111000	5.04532	5.04532
138	80119	11	1	8.27	2	3	3	1	1	2	1	0	36		111000	4408	1	1	1	1	0	1	1	1	4408	111000	3.64424	5.04532
139	80119	12	1	6.8	2	3	3	1	1	2	1	0	36		111000	46037	1	1	1	1	0	1	0	1	46037	111000	4.66311	5.04532
140	80119	13	1	8.42	2	3	3	1	1	2	1	0	36		111000	4408	1	1	1	1	0	1	1	0	4408	111000	3.64424	5.04532
141	80119	14	1	6.43	2	3	3	1	1	2	1	0	36		111000	46037	1	1	1	1	0	0	1	0	46037	111000	4.66311	5.04532
142	80119	15	1	6.76	2	3	3	1	0	2	1	0	36		111000	4408	1	1	1	1	0	0	0	0	4408	111000	3.64424	5.04532
143	80119	16	1	11.73	2	3	3	1	0	2	1	0	36		111000	108956	1	1	1	1	0	1	0	0	108956	111000	5.03725	5.04532
144	210119	1	1	5.01	2	3	3	1	0	7	2	0	29		111000	111000	1	1	1	0	0	1	0	1	111000	111000	5.04532	5.04532
145	210119	2	1	4.55	2	3	3	1	0	7	2	0	29		111000	108956	1	1	1	0	0	1	0	1	108956	111000	5.03725	5.04532
146	210119	3	1	4.68	2	3	3	1	0	3	2	0	29		111000	46037	1	1	1	0	1	1	0	0	46037	111000	4.66311	5.04532
147	210119	4	1	5.08	2	3	3	1	0	7	2	0	29		111000	460	1	1	1	0	1	1	1	0	460	111000	2.66276	5.04532
148	210119	5	1	4.53	2	3	3	1	0	2	1	0	36		111000	108956	1	1	1	0	0	0	0	0	108956	111000	5.03725	5.04532
149	210119	6	1	5.18	2	3	3	1	0	2	1	0	36		111000	2763	1	1	1	0	0	0	0	1	2763	111000	3.44138	5.04532
150	210119	7	1	5.25	2	3	3	1	1	2	1	0	36		111000	111000	1	1	1	0	0	0	0	0	111000	111000	5.04532	5.04532
151	210119	8	1	5.64	2	3	3	1	1	2	1	0	36		111000	111000	1	1	1	0	0	0	0	0	111000	111000	5.04532	5.04532
152	210119	9	1	8.69	1	2	2	1	1	8	4	1	81		111000	3850	1	1	1	1	0	1	0	0	3850	111000	3.58546	5.04532
153	210119	10	1	5.61	1	2	2	1	1	8	4	1	81		111000	4242	1	1	1	0	1	1	1	0	4242	111000	3.62757	5.04532
154	210119	11	1	4.79	1	2	2	1	1	8	4	1	81		111000	111000	1	1	1	1	1	0	0	0	111000	111000	5.04532	5.04532
155	210119	12	1	6.25	1	2	2	1	1	8	4	1	81		111000	111000	1	1	1	1	1	0	0	0	111000	111000	5.04532	5.04532
156	210119	13	1	7.33	1	2	2	1	0	11	7	2	644		111000	108956	1	1	1	1	0	1	1	0	108956	111000	5.03725	5.04532
157	210119	14	1	5	1	2	2	1	1	11	7	2	644		111000	385	1	1	1	0	0	0	0	0	385	111000	2.58546	5.04532
158	40319	1	1	4.86	0	0	0	1	0	2	1	0	36		111000	111000	1	1	1	1	0	0	0	1	111000	111000	5.04532	5.04532
159	40319	2	1	5.35	2	3	3	1	0	2	1	0	36		111000	111000	1	1	1	0	0	0	0	1	111000	111000	5.04532	5.04532
160	40319	3	1	6.1	2	3	3	1	0	2	1	0	36		111000	111000	1	1	1	1	0	0	0	1	111000	111000	5.04532	5.04532
161	40319	4	1	4.72	2	3	3	1	0	2	1	0	36		111000	749	1	1	1	0	0	0	0	0	749	111000	2.87448	5.04532
162	40319	5	1	4.08	2	3	3	1	0	2	1	0	36		111000	46037	1	1	1	1	0	0	0	0	46037	111000	4.66311	5.04532
163	40319	6	1	4.85	1	2	2	1	1	19	1	0	36		111000	108956	1	1	1	1	0	0	0	0	108956	111000	5.03725	5.04532
164	40319	7	1	6.15	1	2	2	1	1	19	1	0	36		111000	2763	1	1	1	1	0	0	0	1	2763	111000	3.44138	5.04532
165	40319	8	1	5.3	1	2	2	1	1	8	4	1	81		111000	460	1	1	1	0	0	1	0	0	460	111000	2.66276	5.04532
166	40319	9	1	5.32	1	2	2	1	1	8	4	1	81		111000	46037	1	1	1	0	0	0	0	1	46037	111000	4.66311	5.04532
167	40319	10	1	5.74	1	2	2	1	1	8	4	1	81		111000	46037	1	1	1	0	0	0	0	1	46037	111000	4.66311	5.04532
168	40319	11	1	8.9	1	2	2	1	1	11	7	2	644		111000	111000	1	1	1	1	0	1	0	1	111000	111000	5.04532	5.04532
169	70319	1	2	3.29	2	3	3	1	0	2	1	0	36		111000	108956	1	1	1	1	0	0	0	1	108956	111000	5.03725	5.04532
170	70319	2	2	1.65	2	3	3	1	0	2	1	0	36		111000	460	1	1	1	1	0	0	0	0	460	111000	2.66276	5.04532
171	70319	3	2	4.58	2	3	3	1	0	2	1	0	36		111000	7486	1	1	1	1	0	0	0	0	7486	111000	3.87425	5.04532
172	70319	4	2	3.42	2	3	3	1	0	3	2	0	29		111000	4604	1	1	1	1	0	0	0	0	4604	111000	3.66314	5.04532
173	70319	5	2	3.23	2	3	3	1	0	7	2	0	29		111000	2915	1	1	1	1	0	0	0	0	2915	111000	3.46464	5.04532
174	70319	6	2	2.38	2	3	3	1	0	2	1	0	36		111000	4604	1	1	1	1	0	0	0	0	4604	111000	3.66314	5.04532
175	70319	7	2	3.4	2	3	3	1	0	2	1	0	36		111000	3477	1	1	1	1	0	0	0	0	3477	111000	3.5412	5.04532
176	70319	8	2	2.48	2	3	3	1	0	2	1	0	36		111000	3850	1	1	1	1	0	0	0	0	3850	111000	3.58546	5.04532
177	70319	9	2	2.2	2	3	3	1	0	2	1	0	36		111000	3850	1	1	1	1	0	0	0	0	3850	111000	3.58546	5.04532
178	110319	1	2	1.6	2	3	3	1	0	3	2	0	29		4604	0	1	0	0	1	0	0	0	0	0.0001	4604	-4	3.66314
179	110319	2	2	1.81	2	3	3	1	0	3	2	0	29		21450	23	1	1	1	1	1	0	0	0	23.0001	21450	1.36173	4.33143
180	110319	3	2	1.5	2	3	3	1	0	3	2	0	29		1090	460	1	1	1	1	0	0	0	0	460	1090	2.66276	3.03743
181	110319	4	2	1.84	2	3	3	1	0	2	1	0	36		10896	0	1	0	0	1	0	0	0	0	0.0001	10896	-4	4.03727
182	110319	5	2	1.35	2	3	3	1	0	3	2	0	29		2035	460	1	1	1	1	0	0	0	0	460	2035	2.66276	3.30856
183	110319	6	2	1.76	2	3	3	1	0	3	2	0	29		111000	749	1	1	1	1	0	0	0	0	749	111000	2.87448	5.04532
184	110319	7	2	2.67	2	3	3	1	0	3	2	0	29		10896	23	1	1	1	1	1	0	0	0	23.0001	10896	1.36173	4.03727
185	110319	8	2	1.47	2	3	3	1	0	7	2	0	29		464	23	1	1	1	1	0	0	0	0	23.0001	464	1.36173	2.66652
186	110319	9	2	1.83	2	3	3	1	0	7	2	0	29		111000	23	1	1	1	1	0	0	0	1	23.0001	111000	1.36173	5.04532
187	110319	10	2	7.59	2	3	3	1	0	7	2	0	29		46037	0	1	0	0	0	0	1	0	0	0.0001	46037	-4	4.66311
188	110319	11	2	3.09	2	3	3	1	0	7	2	0	29		111000	0	1	0	0	1	0	0	0	1	0.0001	111000	-4	5.04532
189	110319	12	2	5.63	2	3	3	1	0	7	2	0	29		4604	23	1	1	1	1	0	0	0	0	23.0001	4604	1.36173	3.66314
190	110319	13	2	1.57	2	3	3	1	0	7	2	0	29		111000	4604	1	1	1	1	0	0	0	0	4604	111000	3.66314	5.04532
191	110319	14	2	2.71	2	3	3	1	0	7	2	0	29		108956	0	1	0	0	1	0	0	0	0	0.0001	108956	-4	5.03725
192	110319	15	2	9.96	2	3	3	1	0	7	2	0	29		111000	23	1	1	1	1	0	0	0	0	23.0001	111000	1.36173	5.04532
193	110319	16	2	9.58	2	3	3	1	0	2	1	0	36		111000	0	1	0	0	0	0	0	0	0	0.0001	111000	-4	5.04532
194	110319	17	2	9.07	2	3	3	1	0	3	2	0	29		14926	460	1	1	1	1	0	1	0	0	460	14926	2.66276	4.17394
195	110319	18	2	4.1	2	3	3	1	0	3	2	0	29		46037	460	1	1	1	1	0	0	0	0	460	46037	2.66276	4.66311
196	110319	19	2	10.82	2	3	3	1	0	3	2	0	29		111000	4604	1	1	1	1	0	1	0	0	4604	111000	3.66314	5.04532
197	250319	1	2	7.25	1	2	2	1	1	7	2	0	29		10896	43	1	1	1	1	0	0	0	0	43.0001	10896	1.63347	4.03727
198	250319	2	2	3.4	1	2	2	1	1	11	7	2	644		46037	460	1	1	1	1	0	0	0	0	460	46037	2.66276	4.66311
199	250319	3	2	3.66	1	2	2	1	1	19	1	0	36		108956	749	1	1	1	1	0	0	0	1	749	108956	2.87448	5.03725
200	250319	4	2	9.39	1	2	2	1	1	7	2	0	29		14926	75	1	1	1	1	0	0	0	0	75.0001	14926	1.87506	4.17394
201	250319	5	2	3	1	2	2	1	1	22					108956	460	1	1	1	1	0	0	0	0	460	108956	2.66276	5.03725
202	250319	6	2	3.81	1	2	2	1	1	19	1	0	36		46037	460	1	1	1	1	0	0	0	1	460	46037	2.66276	4.66311
203	250319	7	2	3.65	1	2	2	1	1	14	8	0	72		21450	460	1	1	1	1	0	0	0	0	460	21450	2.66276	4.33143
204	250319	8	2	3.96	1	2	2	1	1	7	2	0	29		21450	385	1	1	1	1	0	0	0	1	385	21450	2.58546	4.33143
205	250319	9	2	10.37	1	2	2	1	1	14	8	0	72		2145	75	1	1	1	1	0	0	0	0	75.0001	2145	1.87506	3.33143
206	250319	10	2	3.73	1	2	2	1	1	22	0	0	0		7486	4600	1	1	1	1	0	0	0	0	4600	7486	3.66276	3.87425
207	250319	11	2	1.32	0	0	0	1	0	2	1	0	36		4604	427	1	1	1	1	0	0	0	0	427	4604	2.63043	3.66314
208	250319	12	2	1.61	0	0	0	1	0	2	1	0	36		111000	427	1	1	1	1	0	0	0	0	427	111000	2.63043	5.04532
209	250319	13	2	1.71	0	1	1	1	0	7	2	0	29		111000	43	1	1	1	1	0	0	1	0	43.0001	111000	1.63347	5.04532
210	250319	14	2	2.88	0	1	1	1	0	7	2	0	29		108956	427	1	1	1	1	0	0	0	0	427	108956	2.63043	5.03725
211	250319	15	2	1.94	0	1	1	1	0	7	2	0	29		108956	460	1	1	1	1	0	0	0	0	460	108956	2.66276	5.03725
212	250319	16	2	1.4	0	1	1	1	0	NA	13	3			108956	1102	1	1	1	1	0	0	0	0	1102	108956	3.04218	5.03725
213	250319	17	2	1.56	0	1	1	1	0	NA	13	3			46037	1418	1	1	1	1	0	0	0	0	1418	46037	3.15168	4.66311
214	250319	18	2	2.89	0	1	1	1	0	NA	13	3			111000	3850	1	1	1	1	0	0	1	0	3850	111000	3.58546	5.04532
215	250319	19	2	2.65	0	1	1	1	0	NA	13	3			111000	460	1	1	1	1	0	0	0	1	460	111000	2.66276	5.04532
216	10419	1	2		1	2	2	1	0	14	8	0	72		1090	0	1	0	0	1	1	0	0	0	0.0001	1090	-4	3.03743
217	10419	2	2		1	2	2	1	0	11	7	2	644		460	0	1	0	0	1	1	0	1	0	0.0001	460	-4	2.66276
218	10419	3	2		1	2	2	1	0	22	0	0	0		93	0	1	0	0	1	0	0	0	0	0.0001	93.0001	-4	1.96848
219	10419	4	2		1	2	2	1	0	7	2	0	29		93	0	1	0	0	1	0	0	1	0	0.0001	93.0001	-4	1.96848
220	10419	5	2		1	2	2	1	0	22	0	0	0		460	0	1	0	0	1	0	0	0	0	0.0001	460	-4	2.66276
221	10419	6	2		1	2	2	1	0	19	1	0	36		1090	1	1	1	0	1	0	0	0	0	1.0001	1090	4.34273e-05	3.03743
222	10419	7	2		1	2	2	1	0	7	2	0	29		460	1	1	1	0	1	0	0	1	0	1.0001	460	4.34273e-05	2.66276
223	10419	8	2		1	2	2	1	0	14	8	0	72		460	8	1	1	0	1	0	0	0	0	8.0001	460	0.903095	2.66276
224	10419	9	2		1	2	2	1	0	11	7	2	644		460	0	1	0	0	1	0	0	0	0	0.0001	460	-4	2.66276
225	10419	10	2		1	2	2	1	0	11	7	2	644		1090	1	1	1	0	1	0	0	1	0	1.0001	1090	4.34273e-05	3.03743
226	10419	11	2		0	0	0	1	1	23	0	0	0		7486	0	1	0	0	1	0	0	1	0	0.0001	7486	-4	3.87425
227	10419	12	2		0	1	1	1	1	7	2	0	29		111000	460	1	1	1	1	0	0	0	1	460	111000	2.66276	5.04532
228	10419	13	2		0	1	1	1	1	7	2	0	29		4604	1	1	1	0	1	0	0	0	0	1.0001	4604	4.34273e-05	3.66314
229	10419	14	2		0	1	1	1	1	2	1	0	36		46037	460	1	1	1	1	0	0	0	0	460	46037	2.66276	4.66311
230	10419	15	2		0	1	1	1	1	2	1	0	36		111000	460	1	1	1	1	0	0	0	0	460	111000	2.66276	5.04532
231	10419	16	2		0	1	1	1	1	7	2	0	29		4604	6	1	1	0	1	1	0	0	0	6.0001	4604	0.778158	3.66314
232	10419	17	2		0	1	1	1	1	7	2	0	29		46037	460	1	1	1	1	0	0	0	0	460	46037	2.66276	4.66311
233	10419	18	2		0	1	1	1	1	7	2	0	29		29147	23	1	1	1	1	1	0	0	0	23.0001	29147	1.36173	4.46459
234	10419	19	2		0	1	1	1	1	NA	13	3			108956	460	1	1	1	1	0	0	0	0	460	108956	2.66276	5.03725
235	60419	1	2		1	2	2	1	1	22	0	0	0		7486	0	1	0	0	1	0	0	0	0	0.0001	7486	-4	3.87425
236	60419	2	2		1	2	2	1	1	19	1	0	36		11517	9	1	1	0	1	0	0	0	0	9.0001	11517	0.954247	4.06134
237	60419	3	2		1	2	2	1	1	11	7	2	644		14926	4604	1	1	1	1	0	0	0	0	4604	14926	3.66314	4.17394
238	60419	4	2		1	2	2	1	1	22	0	0	0		108956	3	1	1	0	1	0	0	0	0	3.0001	108956	0.477136	5.03725
239	60419	5	2		1	2	2	1	1	7	2	0	29		46037	168	1	1	1	1	0	0	0	0	168	46037	2.22531	4.66311
240	60419	6	2		1	2	2	1	1	14	8	0	72		10896	0	1	0	0	0	0	0	0	0	0.0001	10896	-4	4.03727
241	60419	7	2		1	2	2	1	1	7	2	0	29		46037	0	1	0	0	0	0	0	0	0	0.0001	46037	-4	4.66311
242	60419	8	2		1	2	2	1	1	19	1	0	36		108956	23	1	1	1	1	0	0	0	0	23.0001	108956	1.36173	5.03725
243	60419	9	2		0	0	0	1	1	2	1	0	36		7486	23	1	1	1	1	0	0	0	0	23.0001	7486	1.36173	3.87425
244	60419	10	2		0	1	1	1	1	7	2	0	29		111000	111000	1	1	1	1	0	0	0	1	111000	111000	5.04532	5.04532
245	60419	11	2		0	1	1	1	1	7	2	0	29		111000	108956	1	1	1	0	0	0	0	0	108956	111000	5.03725	5.04532
246	60419	12	2		0	1	1	1	1	NA	13	3			46037	14	1	1	1	0	0	0	0	0	14.0001	46037	1.14613	4.66311
247	60419	13	2		0	1	1	1	1	NA	13	3			111000	460	1	1	1	1	0	0	0	1	460	111000	2.66276	5.04532
248	60419	14	2		0	1	1	1	1	7	2	0	29		46037	57	1	1	1	1	0	0	0	0	57.0001	46037	1.75588	4.66311
249	60419	15	2		0	1	1	1	1	7	2	0	29		4604	23	1	1	1	1	0	0	0	0	23.0001	4604	1.36173	3.66314
250	60419	16	2		0	1	1	1	1	7	2	0	29		46037	23	1	1	1	1	0	0	0	1	23.0001	46037	1.36173	4.66311
251	60419	17	2		0	1	1	1	1	2	1	0	36		111000	1090	1	1	1	1	0	0	0	0	1090	111000	3.03743	5.04532
252	210519	1	3		1	2	2	0	1	25	2	0	29		108956	0	1	0	0	0	1	0	1	1	0.0001	108956	-4	5.03725
253	210519	2	3		1	2	2	0	1	25	2	0	29		110000	0	1	0	0	0	0	0	1	0	0.0001	110000	-4	5.04139
254	210519	3	3		1	2	2	0	1	22	0	0	0		110000	460	1	1	1	0	0	0	1	0	460	110000	2.66276	5.04139
255	210519	4	3		1	2	2	0	1	22	0	0	0		110000	24	1	1	1	0	1	0	1	0	24.0001	110000	1.38021	5.04139
256	210519	5	3		1	2	2	1	0	24	3	1	75		110000	460	1	1	1	0	0	0	1	0	460	110000	2.66276	5.04139
257	210519	6	3		1	2	2	1	0	24	3	1	75		110000	24	1	1	1	0	0	0	1	0	24.0001	110000	1.38021	5.04139
258	210519	7	3		1	2	2	0	1	11	7	2	644		110000	460	1	1	1	0	0	0	1	0	460	110000	2.66276	5.04139
259	210519	8	3		1	2	2	0	1	11	7	2	644		110000	750	1	1	1	0	1	0	1	0	750	110000	2.87506	5.04139
260	210519	9	3		1	2	2	0	1	22					110000	24	1	1	1	0	1	0	1	0	24.0001	110000	1.38021	5.04139
261	210519	10	3		1	2	2	0	1	22					46037	0	1	0	0	0	1	0	1	0	0.0001	46037	-4	4.66311
262	40619	1	3		1	2	2	0	1	8	4	1	81		110000	460	1	1	1	0	0	0	1	1	460	110000	2.66276	5.04139
263	40619	2	3		1	2	2	0	1	22					110000	460	1	1	1	0	0	0	1	1	460	110000	2.66276	5.04139
264	40619	3	3		1	2	2	0	1	7	2	0	29		110000	1102	1	1	1	0	0	0	1	1	1102	110000	3.04218	5.04139
265	40619	4	3		1	2	2	0	1	7	2	0	29		110000	460	1	1	1	0	0	0	1	1	460	110000	2.66276	5.04139
266	40619	5	3		1	2	2	0	1	13	11	2			46037	460	1	1	1	0	0	0	1	1	460	46037	2.66276	4.66311
267	40619	6	3		1	2	2	0	1	8	4	1	81		110000	385	1	1	1	1	0	0	1	1	385	110000	2.58546	5.04139
268	40619	7	3		1	2	2	0	1	11	7	2	644		46000	24	1	1	1	1	0	0	1	0	24.0001	46000	1.38021	4.66276
269	40619	8	3		1	2	2	0	1	22					46000	0	1	0	0	0	0	0	1	0	0.0001	46000	-4	4.66276
270	40619	9	3		1	2	2	0	1	22					110000	24	1	1	1	0	0	0	1	0	24.0001	110000	1.38021	5.04139
271	40619	10	3		1	2	2	0	1	26	12	1	320		110000	460	1	1	1	0	0	0	1	0	460	110000	2.66276	5.04139
272	40619	11	3		2	3	3	0	1	2	1	0	36		110000	4604	1	1	1	0	0	0	1	1	4604	110000	3.66314	5.04139
273	40619	12	3		2	3	3	0	1	8	4	1	81		110000	4600	1	1	1	0	0	0	1	1	4600	110000	3.66276	5.04139
274	40619	13	3		2	3	3	0	1	2	1	0	36		110000	385	1	1	1	1	0	0	1	1	385	110000	2.58546	5.04139
275	40619	14	3		2	3	3	0	1	2	1	0	36		110000	2763	1	1	1	0	0	0	1	0	2763	110000	3.44138	5.04139
276	40619	15	3		2	3	3	0	1	2	1	0	36		110000	460	1	1	1	0	0	0	1	1	460	110000	2.66276	5.04139
277	40619	16	3		2	3	3	0	1	2	1	0	36		110000	23	1	1	1	0	0	0	1	1	23.0001	110000	1.36173	5.04139
278	40619	17	3		2	3	3	0	1	7	2	0	29		110000	38	1	1	1	1	0	0	1	1	38.0001	110000	1.57978	5.04139
279	40619	18	3		2	3	3	0	1	2	1	0	36		110000	1090	1	1	1	1	0	0	1	1	1090	110000	3.03743	5.04139
280	40619	19	3		2	3	3	0	0	7	2	0	29		110000	460	1	1	1	1	0	0	0	1	460	110000	2.66276	5.04139
281	40619	20	3		2	3	3	0	0	2	1	0	36		110000	24	1	1	1	1	0	0	1	1	24.0001	110000	1.38021	5.04139
282	130619	1	3		0	0	0	0	1	2	1	0	36		460	3	1	1	0	1	0	0	1	0	3.0001	460	0.477136	2.66276
283	130619	2	3		0	0	0	0	0	8	4	1	81		110000	460	1	1	1	0	0	0	1	1	460	110000	2.66276	5.04139
284	130619	3	3		0	0	0	0	0	8	4	1	81		110000	460	1	1	1	0	0	0	1	1	460	110000	2.66276	5.04139
285	130619	4	3		0	0	0	0	1	27	0	0	0		4604	0	1	0	0	1	0	0	1	1	0.0001	4604	-4	3.66314
286	130619	5	3		0	0	0	0	0	2	1	0	36		11000	0	1	0	0	0	0	0	1	0	0.0001	11000	-4	4.04139
287	130619	6	3		0	1	1	1	1	2	1	0	36		110000	24	1	1	1	0	0	0	1	0	24.0001	110000	1.38021	5.04139
288	130619	7	3		0	1	1	0	1	7	2	0	29		1090	9	1	1	0	1	0	0	1	1	9.0001	1090	0.954247	3.03743
289	130619	8	3		0	1	1	0	1	2	1	0	36		110000	0	1	0	0	1	0	0	1	0	0.0001	110000	-4	5.04139
290	130619	9	3		0	1	1	0	1	7	2	0	29		1089	0	1	0	0	0	0	0	1	0	0.0001	1089	-4	3.03703
291	130619	10	3		0	1	1	0	1	7	2	0	29		460	0	1	0	0	0	0	0	1	1	0.0001	460	-4	2.66276
292	130619	11	3		2	3	3	0	1	2	1	0	36		110000	0	1	0	0	1	0	0	0	1	0.0001	110000	-4	5.04139
293	130619	12	3		2	3	3	0	0	2	1	0	36		110000	10895	1	1	1	0	0	0	0	1	10895	110000	4.03723	5.04139
294	130619	13	3		2	3	3	0	1	2	1	0	36		110000	1090	1	1	1	0	0	0	1	1	1090	110000	3.03743	5.04139
295	130619	14	3		2	3	3	0	0	2	1	0	36		110000	1368	1	1	1	0	0	0	1	1	1368	110000	3.13609	5.04139
296	130619	15	3		2	3	3	0	1	25	2	0	29		110000	4604	1	1	1	0	0	0	1	0	4604	110000	3.66314	5.04139
297	130619	16	3		2	3	3	0	1	25	2	0	29		110000	460	1	1	1	0	0	0	1	1	460	110000	2.66276	5.04139
298	130619	17	3		2	3	3	0	1	2	1	0	36		110000	1090	1	1	1	0	0	0	0	0	1090	110000	3.03743	5.04139
299	130619	18	3		2	3	3	0	1	7	2	0	29		108956	460	1	1	1	1	0	0	1	0	460	108956	2.66276	5.03725
300	130619	19	3		2	3	3	0	1	7	2	0	29		10896	204	1	1	1	0	0	0	0	0	204	10896	2.30963	4.03727
301	270619	1	3		0	0	0	1	1	2	1	0	36		110000	460	1	1	1	1	0	0	1	1	460	110000	2.66276	5.04139
302	270619	2	3		0	0	0	0	0	2	1	0	36		110000	460	1	1	1	1	0	0	1	1	460	110000	2.66276	5.04139
303	270619	3	3		0	0	0	0	1	8	4	1	81		110000	460	1	1	1	0	0	1	1	0	460	110000	2.66276	5.04139
304	270619	4	3		0	0	0	0	1	22					108956	0	1	0	0	1	0	0	1	0	0.0001	108956	-4	5.03725
305	270619	5	3		0	0	0	0	1	2	1	0	36		1090	0	1	0	0	0	0	0	1	0	0.0001	1090	-4	3.03743
306	270619	6	3		0	1	1	0	1	7	2	0	29		11517	24	1	1	1	1	0	0	1	0	24.0001	11517	1.38021	4.06134
307	270619	7	3		0	1	1	0	1	NA					4604	0	1	0	0	1	0	0	1	0	0.0001	4604	-4	3.66314
308	270619	8	3		0	1	1	1	0	2	1	0	36		110000	460	1	1	1	1	0	0	0	0	460	110000	2.66276	5.04139
309	270619	9	3		0	1	1	0	1	NA					4604	0	1	0	0	1	0	1	1	0	0.0001	4604	-4	3.66314
310	270619	10	3		0	1	1	1	1	7	2	0	29		110000	24	1	1	1	1	0	0	1	1	24.0001	110000	1.38021	5.04139
311	270619	11	3		2	3	3	0	1	2	1	0	36		110000	0	1	0	0	0	0	0	1	0	0.0001	110000	-4	5.04139
312	270619	12	3		2	3	3	0	1	2	1	0	36		110000	460	1	1	1	1	0	0	0	1	460	110000	2.66276	5.04139
313	270619	13	3		2	3	3	0	1	2	1	0	36		110000	2763	1	1	1	1	0	0	1	1	2763	110000	3.44138	5.04139
314	270619	14	3		2	3	3	0	1	2	1	0	36		110000	2763	1	1	1	1	0	0	1	1	2763	110000	3.44138	5.04139
315	270619	15	3		2	3	3	0	1	2	1	0	36		110000	46	1	1	1	0	0	0	1	1	46.0001	110000	1.66276	5.04139
316	270619	16	3		2	3	3	0	1	7	2	0	29		110000	14926	1	1	1	1	0	0	1	1	14926	110000	4.17394	5.04139
317	270619	17	3		2	3	3	0	1	7	2	0	29		110000	2145	1	1	1	0	0	0	1	1	2145	110000	3.33143	5.04139
318	270619	18	3		2	3	3	0	1	2	1	0	36		110000	4604	1	1	1	0	0	0	1	1	4604	110000	3.66314	5.04139
319	270619	19	3		2	3	3	0	1	2	1	0	36		110000	1090	1	1	1	0	0	0	1	1	1090	110000	3.03743	5.04139
320	50719	1	3		1	2	2	0	1	22					108956	0	1	0	0	0	0	0	1	0	0.0001	108956	-4	5.03725
321	50719	2	3		1	2	2	0	1	25	2	0	29		110000	0	1	0	0	1	0	0	1	0	0.0001	110000	-4	5.04139
322	50719	3	3		1	2	2	0	1	2	1	0	36		110000	0	1	0	0	0	0	0	1	0	0.0001	110000	-4	5.04139
323	50719	4	3		1	2	2	0	1	2	1	0	36		108956	0	1	0	0	0	0	0	1	0	0.0001	108956	-4	5.03725
324	50719	5	3		1	2	2	0	1	7	2	0	29		108956	0	1	0	0	0	0	0	1	0	0.0001	108956	-4	5.03725
325	50719	6	3		1	2	2	0	1	2	1	0	36		108956	0	1	0	0	0	0	0	1	0	0.0001	108956	-4	5.03725
326	50719	7	3		1	2	2	0	1	2	1	0	36		46037	0	1	0	0	1	0	0	1	0	0.0001	46037	-4	4.66311
327	50719	8	3		1	2	2	0	1	7	2	0	29		46037	0	1	0	0	0	0	0	1	0	0.0001	46037	-4	4.66311
328	50719	9	3		0	0	0	0	1	2	1	0	36		46037	0	1	0	0	1	0	0	1	0	0.0001	46037	-4	4.66311
329	50719	10	3		0	0	0	0	1	NA					110000	21	1	1	1	0	0	0	0	1	21.0001	110000	1.32222	5.04139
330	50719	11	3		0	0	0	0	1	NA					14926	204	1	1	1	1	0	0	1	1	204	14926	2.30963	4.17394
331	50719	12	3		0	0	0	0	1	2	1	0	36		108956	24	1	1	1	0	0	0	1	0	24.0001	108956	1.38021	5.03725
332	50719	13	3		0	1	1	0	1	2	1	0	36		110000	0	1	0	0	0	0	0	1	0	0.0001	110000	-4	5.04139
333	50719	14	3		0	1	1	0	1	2	1	0	36		108956	0	1	0	0	1	0	0	1	0	0.0001	108956	-4	5.03725
334	50719	15	3		0	1	1	0	1	2	1	0	36		1090	0	1	0	0	1	0	0	1	0	0.0001	1090	-4	3.03743
335	50719	16	3		0	1	1	0	1	7	2	0	29		1090	0	1	0	0	1	0	0	1	0	0.0001	1090	-4	3.03743

## Sheet: tmd
ID	Date	RH	MaxW	Rain	TemMax	Temmin
1	161018	76	7	0	34.8	27.4
2	161018	76	7	0	34.8	27.4
3	161018	76	7	0	34.8	27.4
4	161018	76	7	0	34.8	27.4
5	161018	76	7	0	34.8	27.4
6	161018	76	7	0	34.8	27.4
7	161018	76	7	0	34.8	27.4
8	161018	76	7	0	34.8	27.4
9	161018	76	7	0	34.8	27.4
10	161018	76	7	0	34.8	27.4
11	251018	82	7	0	34.5	26.3
12	251018	82	7	0	34.5	26.3
13	251018	82	7	0	34.5	26.3
14	251018	82	7	0	34.5	26.3
15	251018	82	7	0	34.5	26.3
16	251018	82	7	0	34.5	26.3
17	251018	82	7	0	34.5	26.3
18	251018	82	7	0	34.5	26.3
19	251018	82	7	0	34.5	26.3
20	251018	82	7	0	34.5	26.3
21	251018	82	7	0	34.5	26.3
22	251018	82	7	0	34.5	26.3
23	251018	82	7	0	34.5	26.3
24	251018	82	7	0	34.5	26.3
25	251018	82	7	0	34.5	26.3
26	251018	82	7	0	34.5	26.3
27	11118	54	8	0	33	24.4
28	11118	54	8	0	33	24.4
29	11118	54	8	0	33	24.4
30	11118	54	8	0	33	24.4
31	11118	54	8	0	33	24.4
32	11118	54	8	0	33	24.4
33	211118	72	7	0	35.3	26.1
34	211118	72	7	0	35.3	26.1
35	211118	72	7	0	35.3	26.1
36	211118	72	7	0	35.3	26.1
37	211118	72	7	0	35.3	26.1
38	211118	72	7	0	35.3	26.1
39	211118	72	7	0	35.3	26.1
40	211118	72	7	0	35.3	26.1
41	211118	72	7	0	35.3	26.1
42	211118	72	7	0	35.3	26.1
43	261118	63	5	0	35.2	23.8
44	261118	63	5	0	35.2	23.8
45	261118	63	5	0	35.2	23.8
46	261118	63	5	0	35.2	23.8
47	261118	63	5	0	35.2	23.8
48	261118	63	5	0	35.2	23.8
49	261118	63	5	0	35.2	23.8
50	261118	63	5	0	35.2	23.8
51	261118	63	5	0	35.2	23.8
52	261118	63	5	0	35.2	23.8
53	261118	63	5	0	35.2	23.8
54	261118	63	5	0	35.2	23.8
55	261118	63	5	0	35.2	23.8
56	261118	63	5	0	35.2	23.8
57	261118	63	5	0	35.2	23.8
58	261118	63	5	0	35.2	23.8
59	301118	73	6	0	33.7	25.8
60	301118	73	6	0	33.7	25.8
61	301118	73	6	0	33.7	25.8
62	301118	73	6	0	33.7	25.8
63	301118	73	6	0	33.7	25.8
64	301118	73	6	0	33.7	25.8
65	301118	73	6	0	33.7	25.8
66	301118	73	6	0	33.7	25.8
67	301118	73	6	0	33.7	25.8
68	301118	73	6	0	33.7	25.8
69	301118	73	6	0	33.7	25.8
70	301118	73	6	0	33.7	25.8
71	301118	73	6	0	33.7	25.8
72	301118	73	6	0	33.7	25.8
73	301118	73	6	0	33.7	25.8
74	301118	73	6	0	33.7	25.8
75	51218	66	7	0	36.1	27.4
76	51218	66	7	0	36.1	27.4
77	51218	66	7	0	36.1	27.4
78	51218	66	7	0	36.1	27.4
79	51218	66	7	0	36.1	27.4
80	51218	66	7	0	36.1	27.4
81	51218	66	7	0	36.1	27.4
82	51218	66	7	0	36.1	27.4
83	51218	66	7	0	36.1	27.4
84	51218	66	7	0	36.1	27.4
85	51218	66	7	0	36.1	27.4
86	51218	66	7	0	36.1	27.4
87	51218	66	7	0	36.1	27.4
88	51218	66	7	0	36.1	27.4
89	51218	66	7	0	36.1	27.4
90	51218	66	7	0	36.1	27.4
91	121218	77	6	0	30.5	25.5
92	121218	77	6	0	30.5	25.5
93	121218	77	6	0	30.5	25.5
94	121218	77	6	0	30.5	25.5
95	121218	77	6	0	30.5	25.5
96	121218	77	6	0	30.5	25.5
97	121218	77	6	0	30.5	25.5
98	121218	77	6	0	30.5	25.5
99	121218	77	6	0	30.5	25.5
100	121218	77	6	0	30.5	25.5
101	121218	77	6	0	30.5	25.5
102	121218	77	6	0	30.5	25.5
103	121218	77	6	0	30.5	25.5
104	121218	77	6	0	30.5	25.5
105	121218	77	6	0	30.5	25.5
106	121218	77	6	0	30.5	25.5
107	121218	77	6	0	30.5	25.5
108	181218	65	9	0	33.5	24.5
109	181218	65	9	0	33.5	24.5
110	40119	68	6	0	30.3	23.4
111	40119	68	6	0	30.3	23.4
112	40119	68	6	0	30.3	23.4
113	40119	68	6	0	30.3	23.4
114	40119	68	6	0	30.3	23.4
115	40119	68	6	0	30.3	23.4
116	40119	68	6	0	30.3	23.4
117	40119	68	6	0	30.3	23.4
118	40119	68	6	0	30.3	23.4
119	40119	68	6	0	30.3	23.4
120	40119	68	6	0	30.3	23.4
121	40119	68	6	0	30.3	23.4
122	40119	68	6	0	30.3	23.4
123	40119	68	6	0	30.3	23.4
124	40119	68	6	0	30.3	23.4
125	40119	68	6	0	30.3	23.4
126	40119	68	6	0	30.3	23.4
127	40119	68	6	0	30.3	23.4
128	80119	82	7	0	32.3	26.2
129	80119	82	7	0	32.3	26.2
130	80119	82	7	0	32.3	26.2
131	80119	82	7	0	32.3	26.2
132	80119	82	7	0	32.3	26.2
133	80119	82	7	0	32.3	26.2
134	80119	82	7	0	32.3	26.2
135	80119	82	7	0	32.3	26.2
136	80119	82	7	0	32.3	26.2
137	80119	82	7	0	32.3	26.2
138	80119	82	7	0	32.3	26.2
139	80119	82	7	0	32.3	26.2
140	80119	82	7	0	32.3	26.2
141	80119	82	7	0	32.3	26.2
142	80119	82	7	0	32.3	26.2
143	80119	82	7	0	32.3	26.2
144	210119	72	6	0	35.3	26.2
145	210119	72	6	0	35.3	26.2
146	210119	72	6	0	35.3	26.2
147	210119	72	6	0	35.3	26.2
148	210119	72	6	0	35.3	26.2
149	210119	72	6	0	35.3	26.2
150	210119	72	6	0	35.3	26.2
151	210119	72	6	0	35.3	26.2
152	210119	72	6	0	35.3	26.2
153	210119	72	6	0	35.3	26.2
154	210119	72	6	0	35.3	26.2
155	210119	72	6	0	35.3	26.2
156	210119	72	6	0	35.3	26.2
157	210119	72	6	0	35.3	26.2
158	40319	75		0
159	40319	75		0
160	40319	75		0
161	40319	75		0
162	40319	75		0
163	40319	75		0
164	40319	75		0
165	40319	75		0
166	40319	75		0
167	40319	75		0
168	40319	75		0
169	70319	70	10	0	35.8	27.3
170	70319	70	10	0	35.8	27.3
171	70319	70	10	0	35.8	27.3
172	70319	70	10	0	35.8	27.3
173	70319	70	10	0	35.8	27.3
174	70319	70	10	0	35.8	27.3
175	70319	70	10	0	35.8	27.3
176	70319	70	10	0	35.8	27.3
177	70319	70	10	0	35.8	27.3
178	110319	82	7	0	36	26.9
179	110319	82	7	0	36	26.9
180	110319	82	7	0	36	26.9
181	110319	82	7	0	36	26.9
182	110319	82	7	0	36	26.9
183	110319	82	7	0	36	26.9
184	110319	82	7	0	36	26.9
185	110319	82	7	0	36	26.9
186	110319	82	7	0	36	26.9
187	110319	82	7	0	36	26.9
188	110319	82	7	0	36	26.9
189	110319	82	7	0	36	26.9
190	110319	82	7	0	36	26.9
191	110319	82	7	0	36	26.9
192	110319	82	7	0	36	26.9
193	110319	82	7	0	36	26.9
194	110319	82	7	0	36	26.9
195	110319	82	7	0	36	26.9
196	110319	82	7	0	36	26.9
197	250319	84	8	0	30.7	27.6
198	250319	84	8	0	30.7	27.6
199	250319	84	8	0	30.7	27.6
200	250319	84	8	0	30.7	27.6
201	250319	84	8	0	30.7	27.6
202	250319	84	8	0	30.7	27.6
203	250319	84	8	0	30.7	27.6
204	250319	84	8	0	30.7	27.6
205	250319	84	8	0	30.7	27.6
206	250319	84	8	0	30.7	27.6
207	250319	84	8	0	30.7	27.6
208	250319	84	8	0	30.7	27.6
209	250319	84	8	0	30.7	27.6
210	250319	84	8	0	30.7	27.6
211	250319	84	8	0	30.7	27.6
212	250319	84	8	0	30.7	27.6
213	250319	84	8	0	30.7	27.6
214	250319	84	8	0	30.7	27.6
215	250319	84	8	0	30.7	27.6
216	10419	72	6	0	38.5	29.5
217	10419	72	6	0	38.5	29.5
218	10419	72	6	0	38.5	29.5
219	10419	72	6	0	38.5	29.5
220	10419	72	6	0	38.5	29.5
221	10419	72	6	0	38.5	29.5
222	10419	72	6	0	38.5	29.5
223	10419	72	6	0	38.5	29.5
224	10419	72	6	0	38.5	29.5
225	10419	72	6	0	38.5	29.5
226	10419	72	6	0	38.5	29.5
227	10419	72	6	0	38.5	29.5
228	10419	72	6	0	38.5	29.5
229	10419	72	6	0	38.5	29.5
230	10419	72	6	0	38.5	29.5
231	10419	72	6	0	38.5	29.5
232	10419	72	6	0	38.5	29.5
233	10419	72	6	0	38.5	29.5
234	10419	72	6	0	38.5	29.5
235	60419	74	8	0	35.3	27.5
236	60419	74	8	0	35.3	27.5
237	60419	74	8	0	35.3	27.5
238	60419	74	8	0	35.3	27.5
239	60419	74	8	0	35.3	27.5
240	60419	74	8	0	35.3	27.5
241	60419	74	8	0	35.3	27.5
242	60419	74	8	0	35.3	27.5
243	60419	74	8	0	35.3	27.5
244	60419	74	8	0	35.3	27.5
245	60419	74	8	0	35.3	27.5
246	60419	74	8	0	35.3	27.5
247	60419	74	8	0	35.3	27.5
248	60419	74	8	0	35.3	27.5
249	60419	74	8	0	35.3	27.5
250	60419	74	8	0	35.3	27.5
251	60419	74	8	0	35.3	27.5
252	210519	71	7	1.2	37.7	29
253	210519	71	7	1.2	37.7	29
254	210519	71	7	1.2	37.7	29
255	210519	71	7	1.2	37.7	29
256	210519	71	7	1.2	37.7	29
257	210519	71	7	1.2	37.7	29
258	210519	71	7	1.2	37.7	29
259	210519	71	7	1.2	37.7	29
260	210519	71	7	1.2	37.7	29
261	210519	71	7	1.2	37.7	29
262	40619	74	7	0	36.7	29.3
263	40619	74	7	0	36.7	29.3
264	40619	74	7	0	36.7	29.3
265	40619	74	7	0	36.7	29.3
266	40619	74	7	0	36.7	29.3
267	40619	74	7	0	36.7	29.3
268	40619	74	7	0	36.7	29.3
269	40619	74	7	0	36.7	29.3
270	40619	74	7	0	36.7	29.3
271	40619	74	7	0	36.7	29.3
272	40619	74	7	0	36.7	29.3
273	40619	74	7	0	36.7	29.3
274	40619	74	7	0	36.7	29.3
275	40619	74	7	0	36.7	29.3
276	40619	74	7	0	36.7	29.3
277	40619	74	7	0	36.7	29.3
278	40619	74	7	0	36.7	29.3
279	40619	74	7	0	36.7	29.3
280	40619	74	7	0	36.7	29.3
281	40619	74	7	0	36.7	29.3
282	130619	72	8	0	35	29.1
283	130619	72	8	0	35	29.1
284	130619	72	8	0	35	29.1
285	130619	72	8	0	35	29.1
286	130619	72	8	0	35	29.1
287	130619	72	8	0	35	29.1
288	130619	72	8	0	35	29.1
289	130619	72	8	0	35	29.1
290	130619	72	8	0	35	29.1
291	130619	72	8	0	35	29.1
292	130619	72	8	0	35	29.1
293	130619	72	8	0	35	29.1
294	130619	72	8	0	35	29.1
295	130619	72	8	0	35	29.1
296	130619	72	8	0	35	29.1
297	130619	72	8	0	35	29.1
298	130619	72	8	0	35	29.1
299	130619	72	8	0	35	29.1
300	130619	72	8	0	35	29.1
301	270619	81	9	13.7	32.6	27.6
302	270619	81	9	13.7	32.6	27.6
303	270619	81	9	13.7	32.6	27.6
304	270619	81	9	13.7	32.6	27.6
305	270619	81	9	13.7	32.6	27.6
306	270619	81	9	13.7	32.6	27.6
307	270619	81	9	13.7	32.6	27.6
308	270619	81	9	13.7	32.6	27.6
309	270619	81	9	13.7	32.6	27.6
310	270619	81	9	13.7	32.6	27.6
311	270619	81	9	13.7	32.6	27.6
312	270619	81	9	13.7	32.6	27.6
313	270619	81	9	13.7	32.6	27.6
314	270619	81	9	13.7	32.6	27.6
315	270619	81	9	13.7	32.6	27.6
316	270619	81	9	13.7	32.6	27.6
317	270619	81	9	13.7	32.6	27.6
318	270619	81	9	13.7	32.6	27.6
319	270619	81	9	13.7	32.6	27.6
320	50719	93	6	12	28.2	24.7
321	50719	93	6	12	28.2	24.7
322	50719	93	6	12	28.2	24.7
323	50719	93	6	12	28.2	24.7
324	50719	93	6	12	28.2	24.7
325	50719	93	6	12	28.2	24.7
326	50719	93	6	12	28.2	24.7
327	50719	93	6	12	28.2	24.7
328	50719	93	6	12	28.2	24.7
329	50719	93	6	12	28.2	24.7
330	50719	93	6	12	28.2	24.7
331	50719	93	6	12	28.2	24.7
332	50719	93	6	12	28.2	24.7
333	50719	93	6	12	28.2	24.7
334	50719	93	6	12	28.2	24.7
335	50719	93	6	12	28.2	24.7
		75.0776	6.99383	1.38597	34.0759	26.7951
		7.40189	1.09712	3.95535	2.63773	1.7472
		%	nott	mm	C	C

## Sheet: Directory
A	ID
B	Date
C	Sample	0=shrimp
		1=oyster
		2=blood cockle
		3=Asian seabass
D	Weight	gram
E	District	0= Din Daeng
		1=Huay Kwang
		2=Samphanthawong
		3= Dusit
F	Location	0= Din Daeng
		1= Huay Kwang
		2=Yaowarat
		3=Saphan Khao
G	Shelf	0=pooled sample
		1=separated sample
H	Ice	0=no
		1=yes
I	Source	0=Bangkok
		1=Samut Sakhon
		2=Samut Prakan
		3=Chachoengsao
		4=Chonburi
		5=Ranong
		6=Krabi
		7=Surat Thani
		8=Samut Songkhram
		9=Chumporn
		10=Nonthaburi
		11=south
		12=Trat
		13=NA
J	LB	Total coliform
K	BGLB	Fecal coliform
L	EC	E. coli	EC cut<10 MPN/g
M	VP	V. parahaemolyticus
N	VV	V. vulnificus
O	VA	V. al
P	VC	V. cholera
Q	Sal	Salmonella
